# Supplementary material for: Piezo1 Knockdown Activates PI3K/AKT and Enhances SPP1 to Drive M2 Macrophage Polarization and Reduce Cardiac Inflammation
Source: Research Square preprint supplement (doi:10.21203/rs.3.rs-6737272/v1), 2025-07-14
Supplement: Supplementary file 1 [file 59aba62d0234cb3623ba8f6d.docx]

SUPPLEMENTAL MATERIAL

1. Intraperitoneal injection of LPS leads to a decline in cardiac function in WT (wild-type) mice.


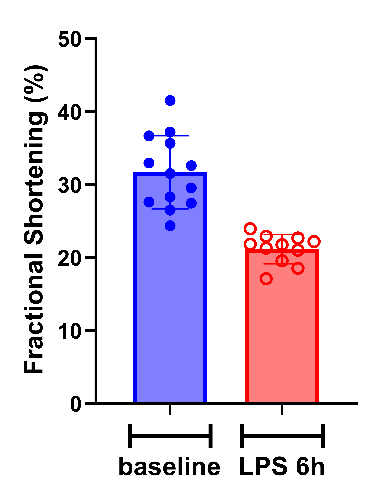

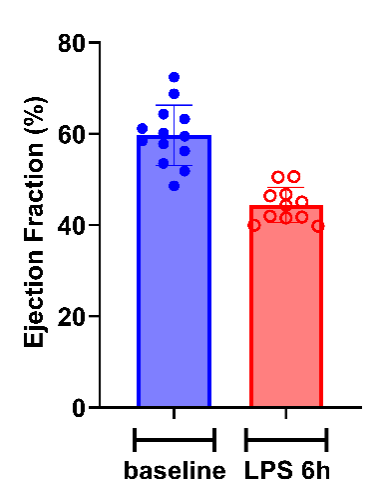


**Fig. S1**. Echocardiographic measurement of LVEF and FS pre- and post-intraperitoneal injection of LPS

2. Intraperitoneal injection of LPS leads to Piezo1 protein increased in cardiac tissue from WT (wild-type) mice.


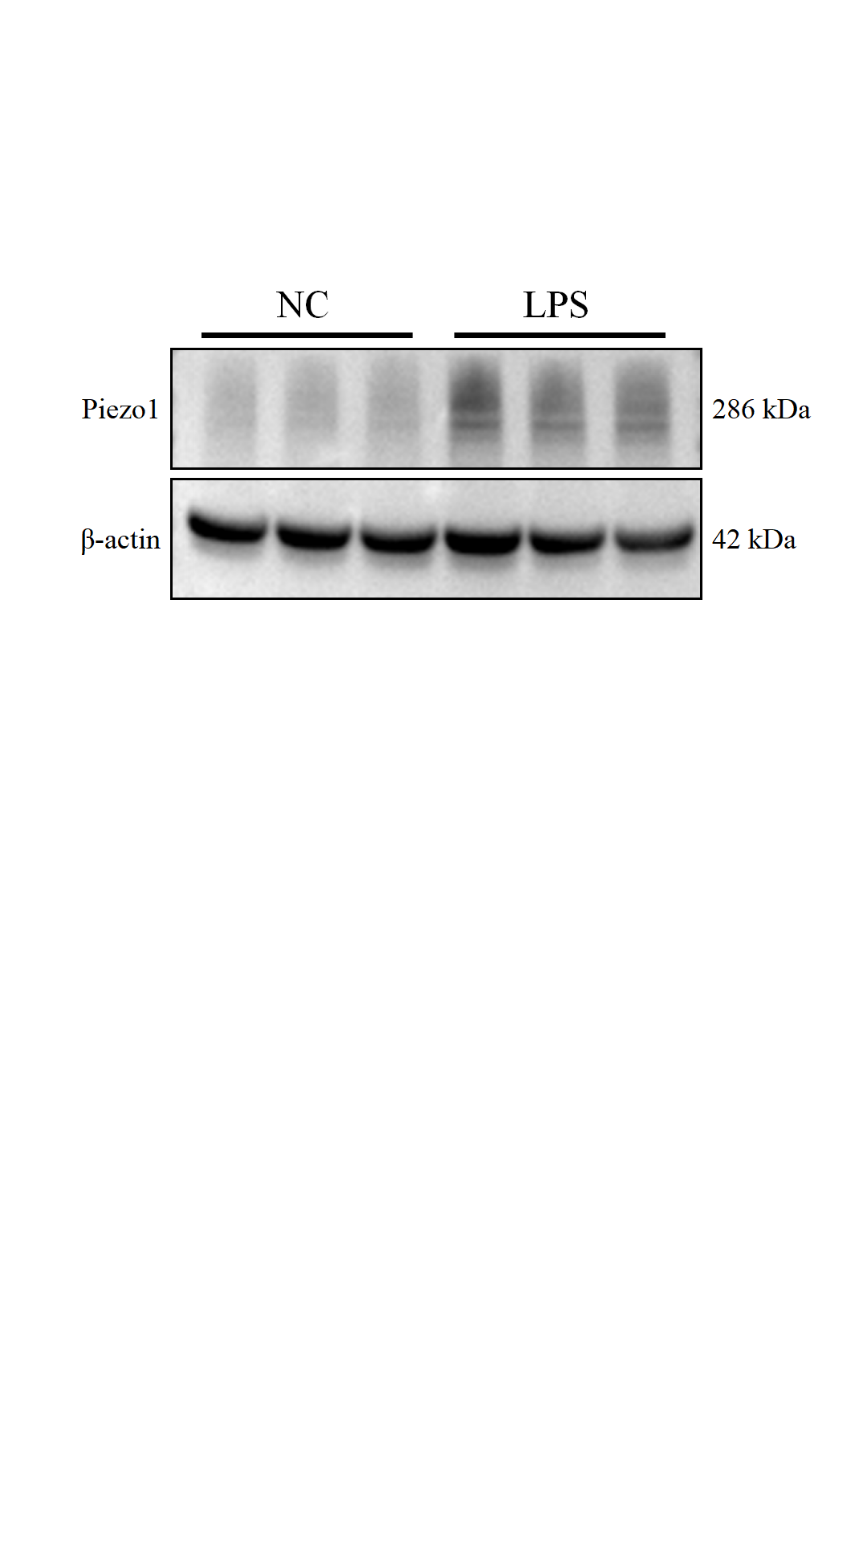


**Fig. S2**. Western blot results for cardiac tissue pre- and post-intraperitoneal injection of LPS.

3. Flow cytometric gating strategy.


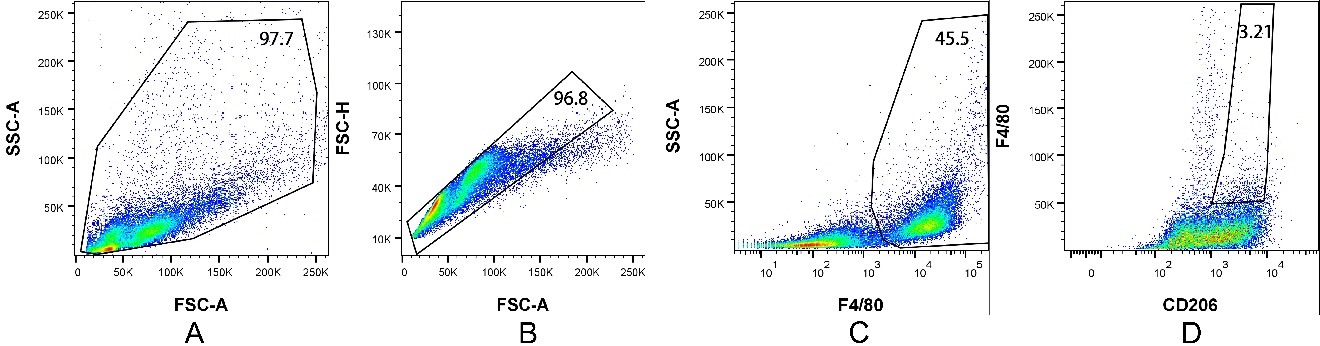


**Fig. S3**. The flow cytometry gating strategy. **A**. Exclude cell debris. **B**. Select singlet cells to eliminate cell aggregates. **C**. Identify F4/80 positive cells (macrophages). **D**. Select CD206 positive cells (M2-type macrophages).

4. Primer sequences for genotyping gene knockout mice.

| **Table S1**. Primer sequences for gene identification | | | | |
| --- | --- | --- | --- | --- |
| Gene | Sequence | Sequence (5' -> 3') | Length | Tm |
| Piezo1fl/fl | Forward Primer | CCT TGC CCT TGT ACC TGT GC | 20 | 59.48 |
| Reverse Primer | CCT GGC TGG AAA ATG GAA GAT | 21 | 55.11 |
| Lyz2-Cre | Forward Primer | CCC AGA AAT GCC AGA TTA CG | 20 | 53.6 |
| Reverse Primer | CTT GGG CTG CCA GAA TTT CTC | 21 | 56.68 |

1. Main Reagents and Antibodies.

| **Table S2**. Main Reagents and Antibodies | | | | |
| --- | --- | --- | --- | --- |
| Product name | Brand | Catalog Number | | |
| TransDirect Mouse Genotyping Kit | Transgenbiotech | | | AD501-02 |
| Tris Acetate-EDTA buffer (50x) | Beyotime | | | ST716 |
| Agarose | Transgenbiotech | | | GS201-01 |
| RIPA Lysis Buffer | Beyotime | | | P0012K |
| NuPAGE™ LDS Sample Buffer (4×) | Invitrogen | | | NP0007 |
| NuPAGE™ Sample Reducing Agent (10×) | Invitrogen | | | NP0009 |
| NuPAGE™ MOPS SDS Running Buffer (20×) | Invitrogen | | | NP0001 |
| NuPAGE™ 4-12% Bis-Tris Gel 1.0mm x 12 well | Invitrogen | | | NP0322BOX |
| Omni-Flash™Western Blot Rapid Transfer Buffer (10×) | Omni-Flash | | | PS201S |
| Thermo Scientific PageRuler Prestained Protein Ladder | Thermo scientific | | | 26616 |
| Thermo Scientific Spectra Multicolor High Range Protein Ladder | Thermo scientific | | | 26625 |
| TBST (10×) | Applygen | | | B1009-TBST |
| BD Difco Skim Milk | Difco | | | 232100 |
| Primary Antibody Dilution Buffer | Beyotime | | | P0023A-500ml |
| Immobilon Western | Millipore | | WBKLS0100 | |
| Peroxidase-Conjugated Goat anti-Rabbit IgG (H+L) | ORIGENE | | | 2B-2301 |
| Peroxidase-Conjugated Goat anti-Mouse IgG (H+L） | ORIGENE | | | 2B-2305 |
| β-Actin Monoclonal antibody | Proteintech | | | 66009-1-Ig |
| α-Tubulin Polyclonal antibody | Proteintech | | | 11224-1-AP |
| Piezo1 (extracellular domain) Polyclonal antibody | Proteintech | | | 15939-1-AP |
| IL-1β Polyclonal antibody | Proteintech | | | 26048-1-AP |
| IL-6 Polyclonal antibody | Proteintech | | | 26404-1-AP |
| IL-6 (D3K2N) Rabbit mAb | Cell Signaling Technology | | | 12153 |
| IL-10RA Polyclonal antibody | Proteintech | | | 13356-1-AP |
| Phospho-Akt (Ser473) (D9E) XP® Rabbit mAb (Biotinylated) | Cell Signaling Technology | | | 5012S |
| Akt (pan) (11E7) Rabbit mAb | Cell Signaling Technology | | | 4685S |
| Phospho-S6 Ribosomal Protein (Ser240/244) (D68F8) XP® Rabbit mAb | Cell Signaling Technology | | | 5364S |
| Anti-Osteopontin antibody [RM1018] | Abcam | | | AB283656 |
| Amersham Protran | Cytiva | | | 10600007 |
| Lipopolysaccharides from Escherichia coli O111:B4 | Sigma-Aldrich | | | L2630 |
| Phosphate Buffered Saline (1×) | Servicebio | | | G4202-500ML |
| Corning® 500 mL RPMI 1640 | CORNING | | | 10-040-CV |
| Gibco DMEM basic (1X) | Gibco | | | C11885500BT |
| Macrophage colony-stimulating factor (M-CSF) | Merck | | | HY-P70553 |
| TransSerum® RQ Fetal Bovine Serum | Transgenbiotech | | | FS401-02 |
| Penicillin-Streptomycin Solution, 100X | Solarbio | | | P1400 |
| Thioglycollate Broth Medium | Solarbio | | | LA8740 |
| FIX&PERM Cell Permeabilization Kit | Invitrogen | | | GAS003 |
| Purified anti-mouse CD16/32 Antibody | Biolegend | | | 101302 |
| Alexa Fluor® 647 anti-mouse F4/80 Antibody | Biolegend | | | 123122 |
| CD86 (B7-2) Monoclonal Antibody (GL1), PE, eBioscience™ | Invitrogen | | | 12-0862-82 |
| CD206 (MMR) Monoclonal Antibody (MR6F3), Alexa Fluor™ 488, eBioscience™ | Invitrogen | | | 53-2061-82 |

**Full Unedited Gel Figures**

**
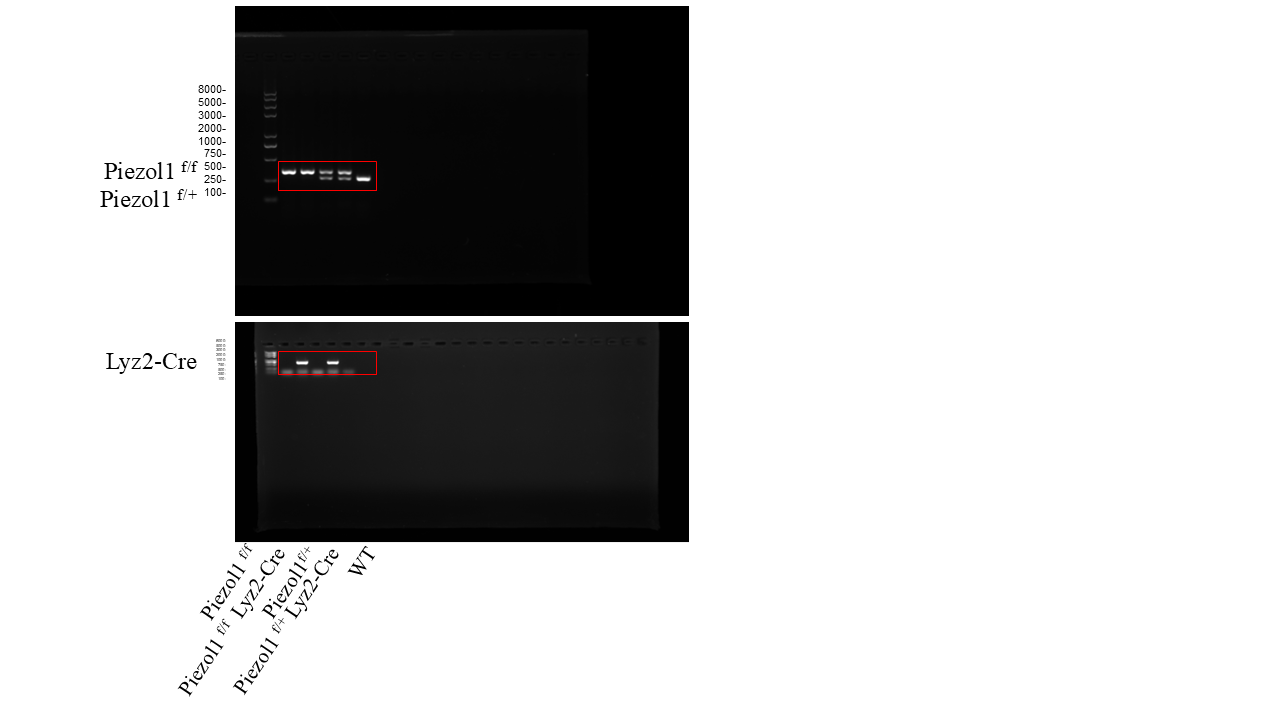
**

Full uncropped gels for Figure 1D. The red rectangle indicates the portion of the blot displayed in the manuscript.

**
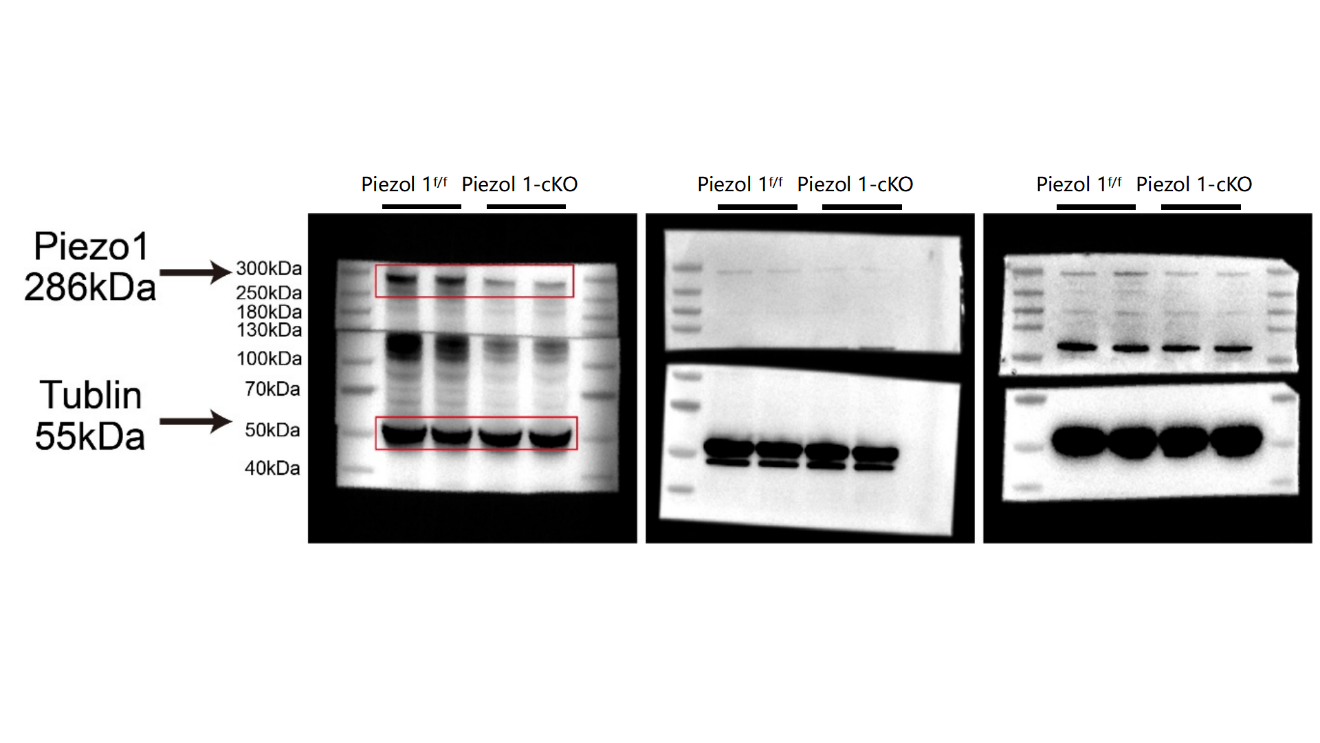
**

Full uncropped immunoblots for Figure 1E. The red rectangle indicates the portion of the blot displayed in the manuscript.

**
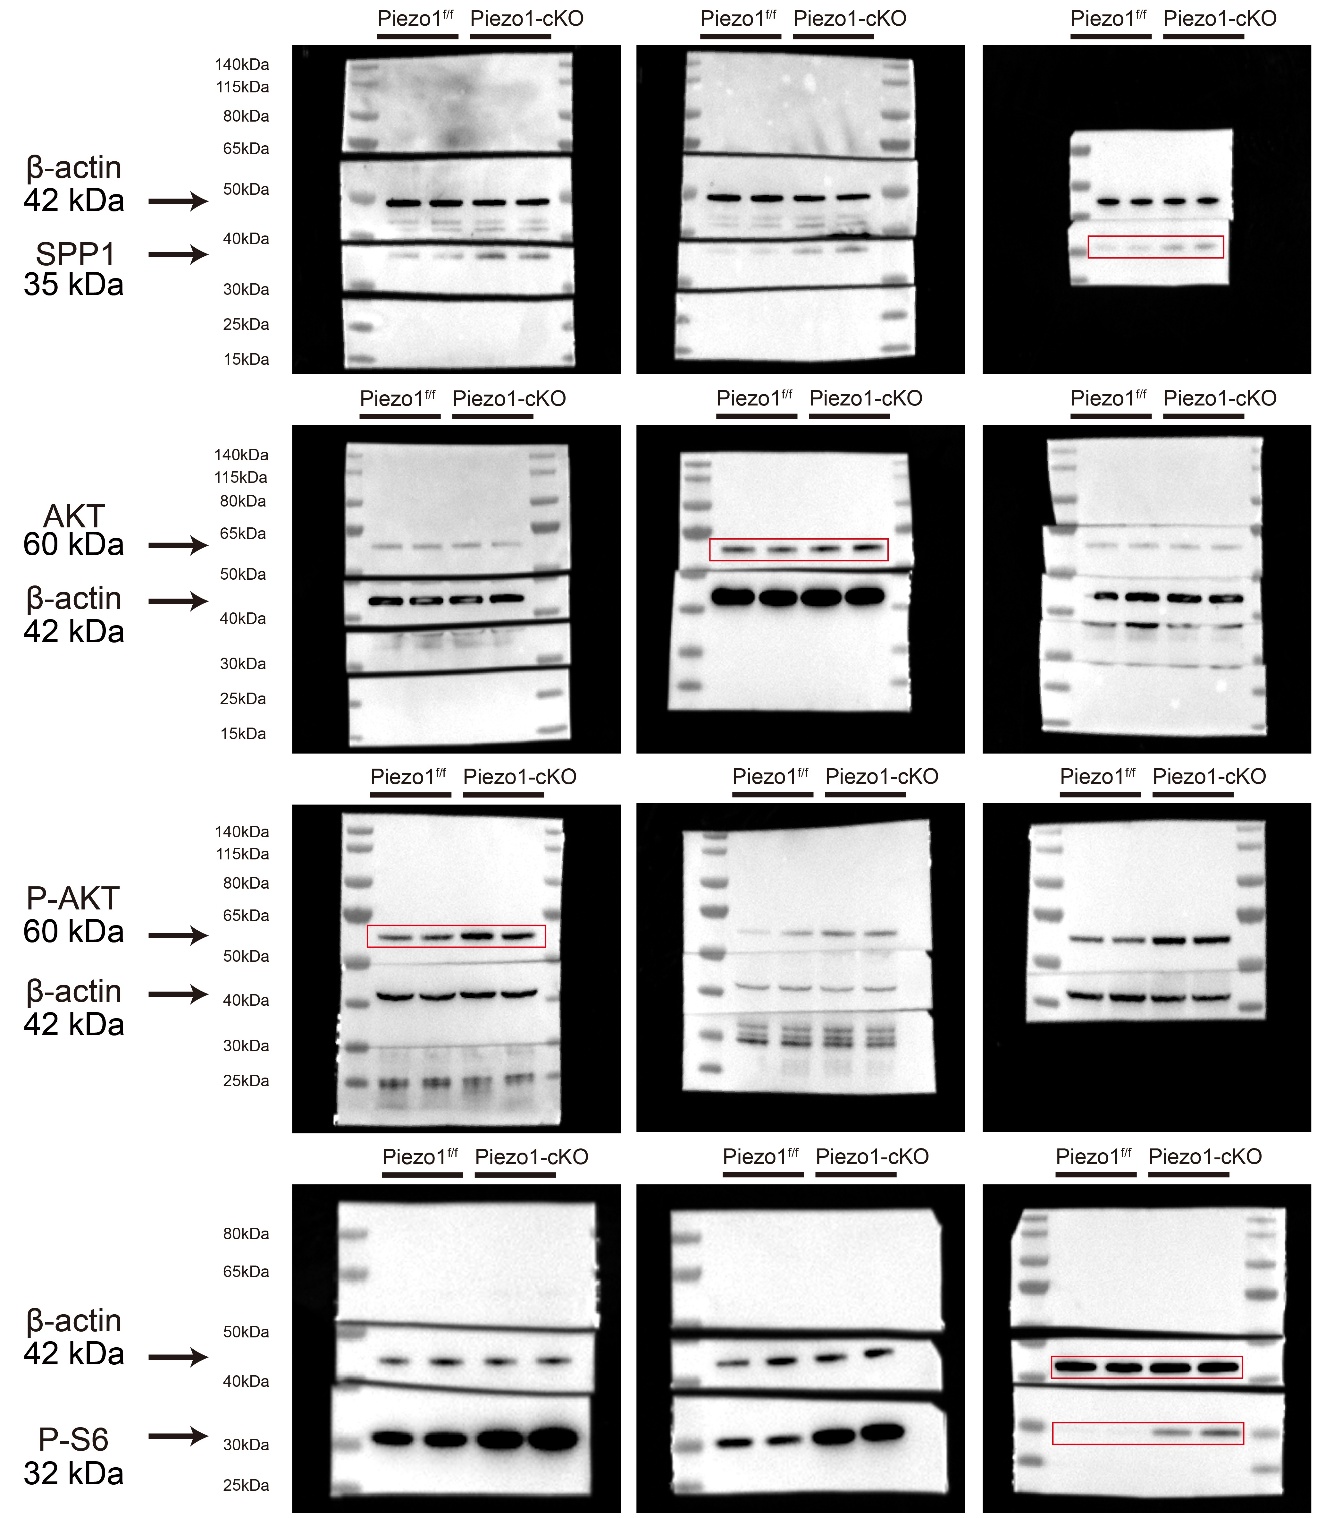
**

Full uncropped immunoblots for Figure 3E. The red rectangle indicates the portion of the blot displayed in the manuscript.

**
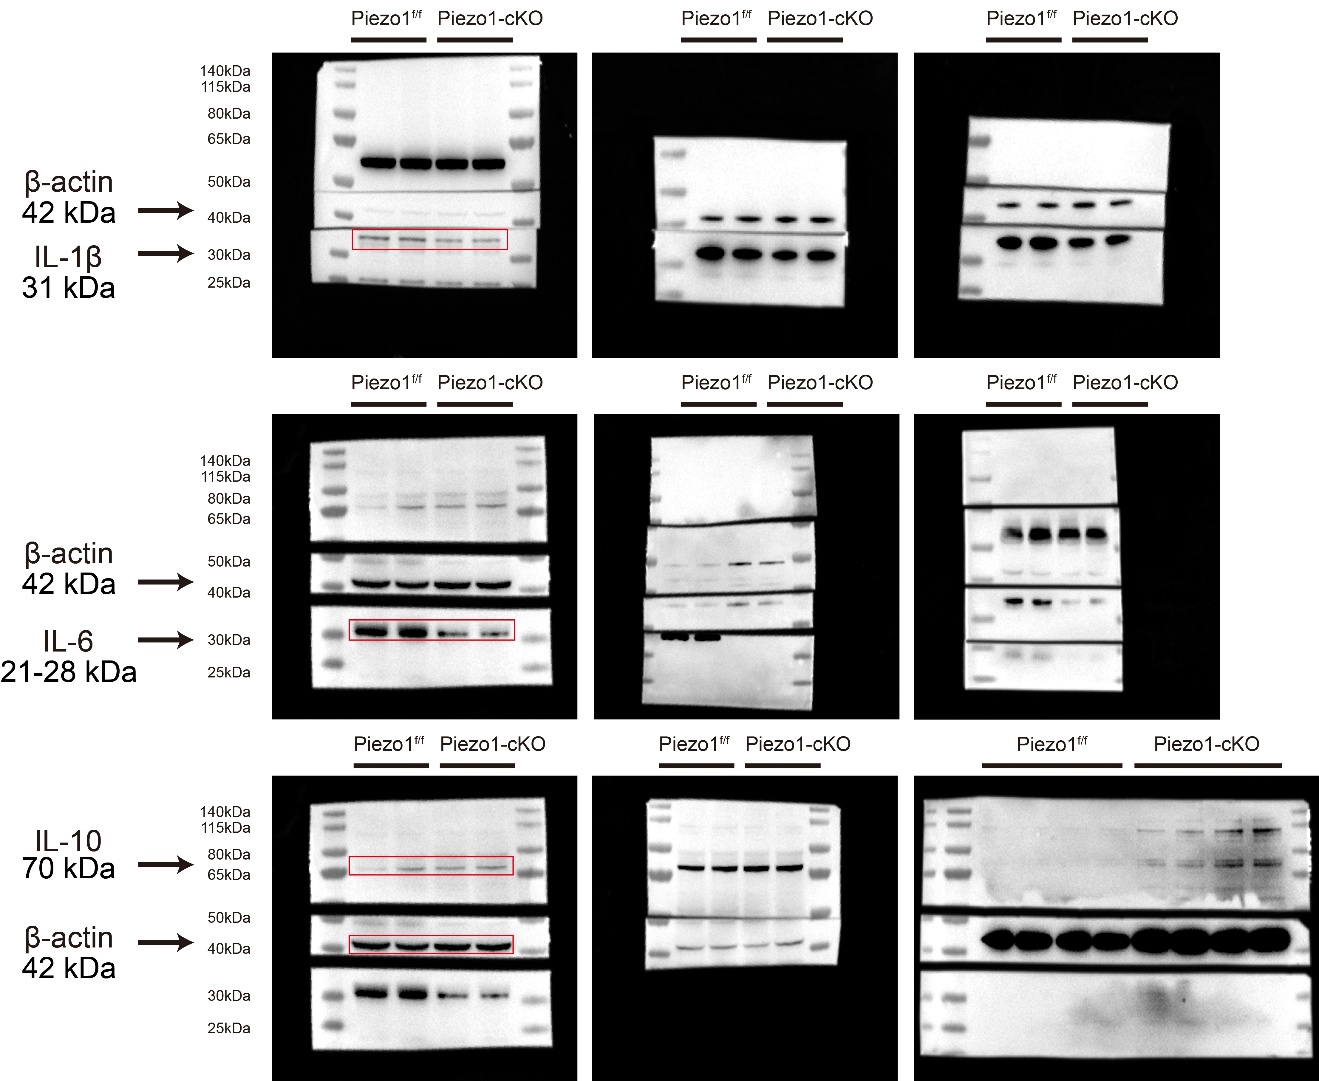
**

Full uncropped immunoblots for Figure 3F. The red rectangle indicates the portion of the blot displayed in the manuscript.

**
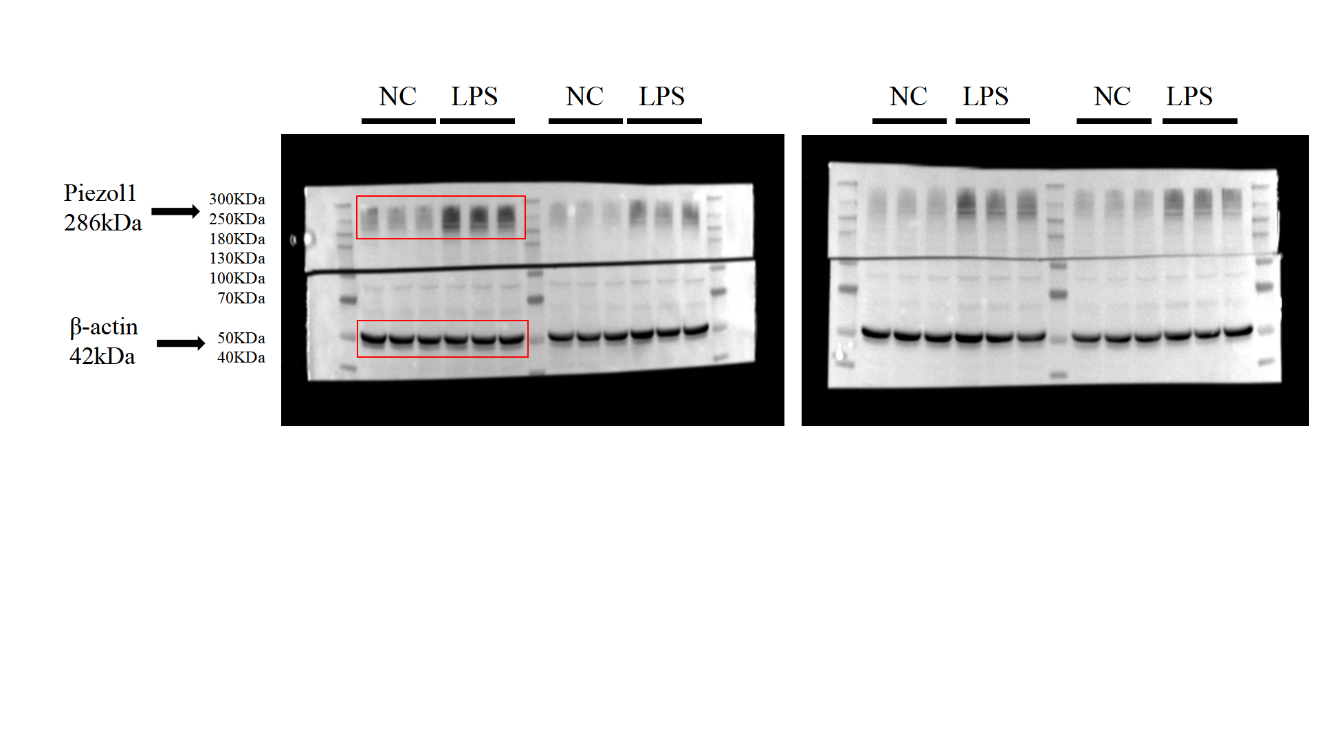
**

Full uncropped immunoblots for FigureS2. The red rectangle indicates the portion of the blot displayed in the manuscript.
